# Supplementary material for: Global Ground-based Tropospheric Ozone Measurements: Reference Data and Individual Site Trends (2000–2022) from the TOAR-II/HEGIFTOM Project
Source: Copernicus journal article supplement (doi:10.5194/egusphere-2024-3736), 2025-01-13
Supplement: Supplementary file 1 [file egusphere-2024-3736-supplement.pdf]

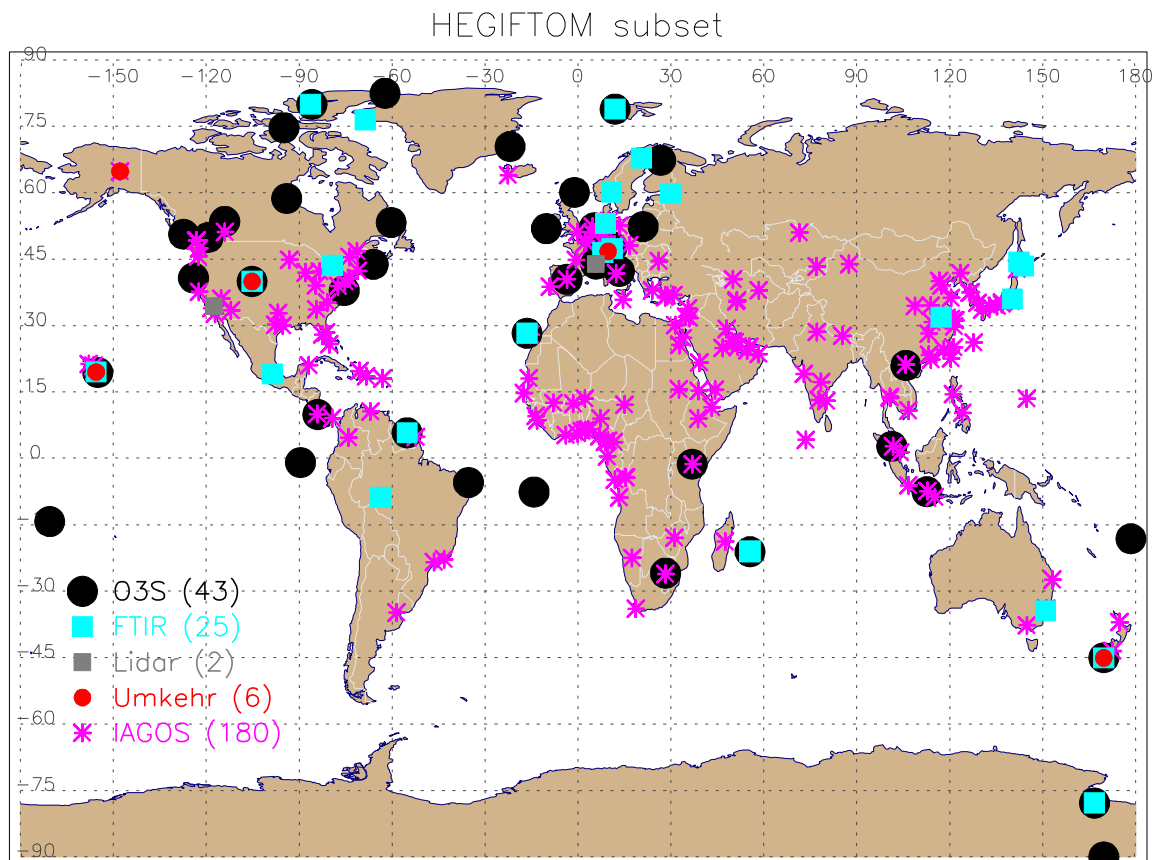

**Figure S1:** Map showing all HEGIFTOM sites with TrOC data since 2000. A list of those stations, together with latitude, longitude, beginning and end year, and amount of observations in the 2000-2022 period is provided in Table S1.

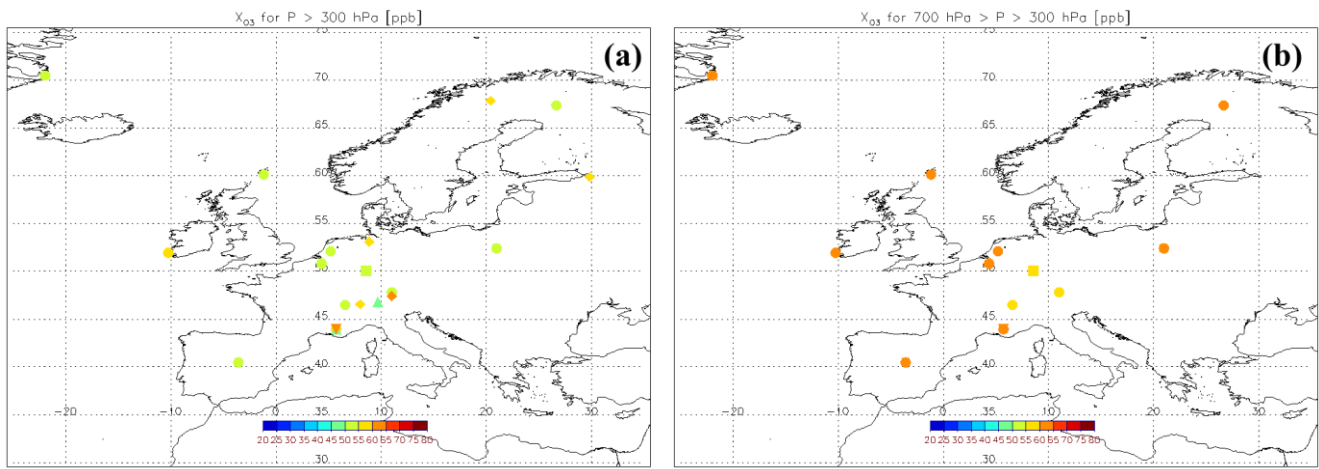

10

**Figure S2:** Close-up of Fig. 4: mean (a) TrOC (ppb, surface to 300 hPa), (b) FTOC (ppb, 700>p>to 300 hPa) at European HEGIFTOM sites with at least 120 monthly values in the 2000-2022 period. Circles denote ozonesondes, squares = IAGOS airports, diamonds=FTIR, upward triangles=Umkehr, downward triangles=lidar.

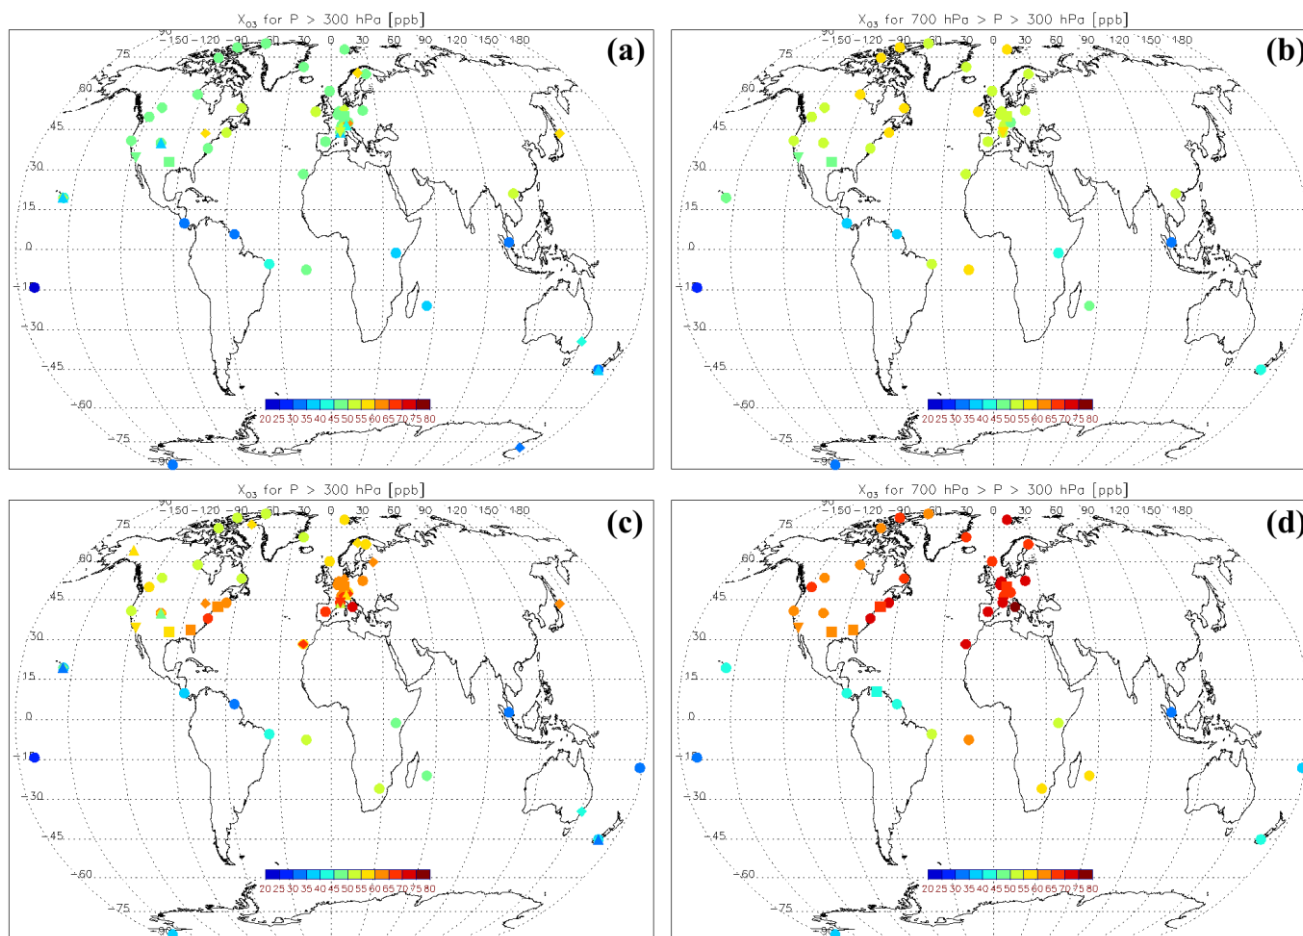

15

Figure S3: Same as Fig. 4, but now for TrOC DJF (a) and JJA (c), and for FTOC DJF (b) and JJA (d).

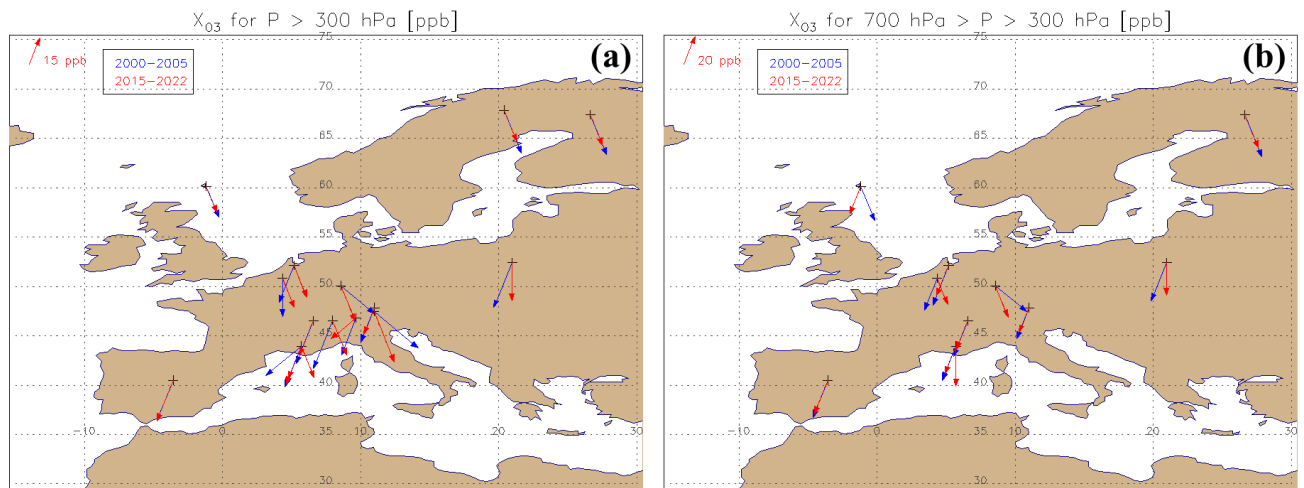

**Figure S4: Close-up of Fig. 6 for Europe.**

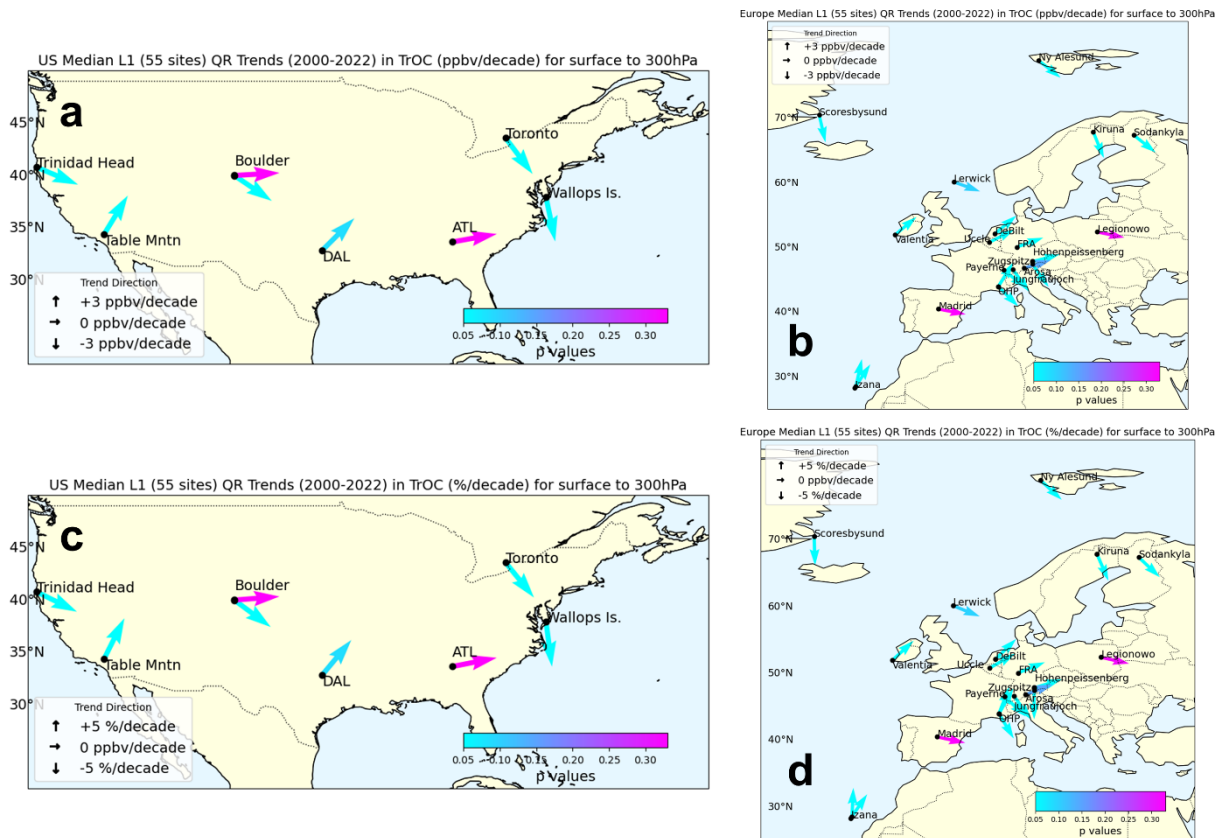

25 **Figure S5. Close-up of trends at stations within highly-sampled regions: (a) US; (b) Europe. Multiple arrows correspond to multi-instrument sites, Boulder in (a), OHP and Izaña in (b). (c) Trend same as (a) except in %/decade with p-values; (d) same as (b) except in %/decade with p-values.**

30

35

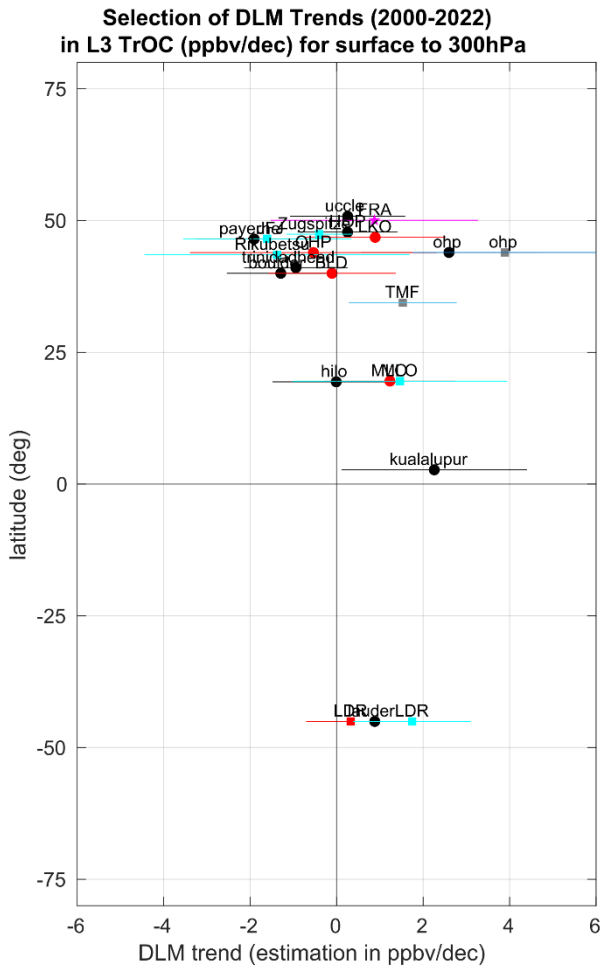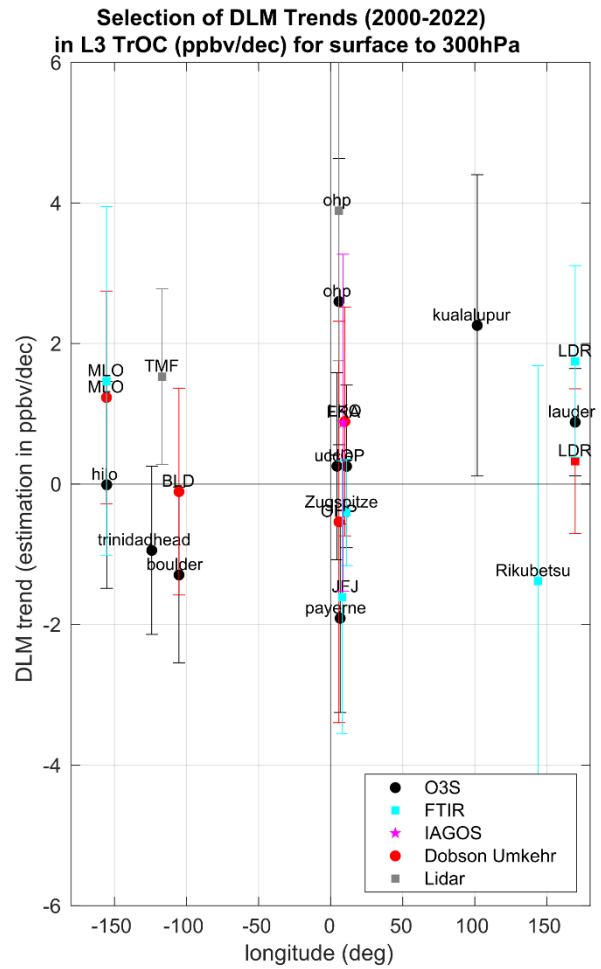

40 **Figure S6: DLM trend estimates (ppbv/dec), based on the monthly mean time series for a subset of sites from our sample. DLM trend values are output in ppbv/year. In order to compare DLM trend values with QR and MLR decadal trend values, we need to give an estimate of the trend in ppbv/dec. DLM outputs a distribution of ozone change between the beginning and the end of the considered time period and the trend values in ppbv/dec are determined in ratio. The uncertainty on these values is determined by Monte-Carlo simulations. Assuming the distribution to be normal, we estimate the standard deviation of the trends values from the FWHM of the distribution.**

45

50

**Table S1: Overview of all HEGIFTOM sites with TrOC data since 2000. The instruments, site names, latitude, longitude, begin and end period of the observations, the total amount of (L1) TrOC observations, and the number of months with (L3) observations are shown.**

| <b>Instrument</b> | <b>Site/Airport</b> | <b>lat</b> | <b>lon</b> | <b>begin</b> | <b>end</b> | <b>N<sub>obs</sub></b> | <b>N<sub>months</sub></b> |
|-------------------|---------------------|------------|------------|--------------|------------|------------------------|---------------------------|
| O3S               | Alert               | 82.49      | -62.34     | 2000         | 2020       | 931                    | 227                       |
| FTIR              | Eureka              | 80.05      | -86.42     | 2006         | 2020       | 6261                   | 97                        |
| O3S               | Eureka              | 79.98      | -85.94     | 2000         | 2021       | 1345                   | 248                       |
| O3S               | Ny Alesund          | 78.92      | 11.93      | 2000         | 2022       | 1794                   | 276                       |
| FTIR              | Ny Alesund          | 78.92      | 11.92      | 2000         | 2022       | 2052                   | 119                       |
| FTIR              | Thule               | 76.53      | -68.74     | 2000         | 2022       | 6204                   | 163                       |
| O3S               | Resolute            | 74.70      | -94.96     | 2000         | 2021       | 771                    | 199                       |
| O3S               | Scoresbysund        | 70.48      | -21.97     | 2000         | 2022       | 1127                   | 264                       |
| FTIR              | Kiruna              | 67.84      | 20.40      | 2000         | 2022       | 4853                   | 230                       |
| O3S               | Sodankylä           | 67.37      | 26.65      | 2000         | 2022       | 1074                   | 254                       |
| Umk               | 105 (Fairbanks)     | 64.86      | -147.85    | 2000         | 2021       | 1652                   | 148                       |
| IAGOS             | FAI                 | 64.82      | -147.87    | 2015         | 2016       | 7                      | 3                         |
| IAGOS             | KEF                 | 64.00      | -22.62     | 2003         | 2013       | 14                     | 5                         |
| FTIR              | Harestua            | 60.20      | 10.80      | 2009         | 2020       | 2366                   | 112                       |
| O3S               | Lerwick             | 60.13      | -1.18      | 2000         | 2022       | 1203                   | 243                       |
| FTIR              | Peterhof            | 59.88      | 29.82      | 2009         | 2023       | 5764                   | 133                       |
| O3S               | Churchill           | 58.74      | -94.07     | 2000         | 2021       | 690                    | 183                       |
| IAGOS             | HAM                 | 53.63      | 10.01      | 2000         | 2011       | 5                      | 5                         |
| O3S               | Edmonton            | 53.54      | -114.10    | 2000         | 2021       | 969                    | 244                       |
| O3S               | Goose Bay           | 53.31      | -60.36     | 2000         | 2021       | 953                    | 230                       |
| FTIR              | Bremen              | 53.10      | 8.85       | 2004         | 2023       | 1994                   | 164                       |
| IAGOS             | TXL                 | 52.55      | 13.29      | 2001         | 2021       | 38                     | 8                         |
| O3S               | Legionowo           | 52.40      | 20.97      | 2000         | 2022       | 1340                   | 276                       |
| IAGOS             | AMS                 | 52.31      | 4.76       | 2014         | 2016       | 151                    | 21                        |
| O3S               | De Bilt             | 52.10      | 5.18       | 2000         | 2020       | 1085                   | 252                       |
| O3S               | Valentia            | 51.94      | -10.25     | 2000         | 2022       | 600                    | 127                       |
| IAGOS             | DUS                 | 51.28      | 6.77       | 2000         | 2015       | 716                    | 26                        |
| IAGOS             | LGW                 | 51.16      | -0.16      | 2005         | 2009       | 378                    | 40                        |
| IAGOS             | YYC                 | 51.13      | -114.01    | 2009         | 2011       | 168                    | 17                        |
| IAGOS             | TSE                 | 51.03      | 71.46      | 2006         | 2022       | 214                    | 55                        |
| IAGOS             | BRU                 | 50.90      | 4.48       | 2000         | 2009       | 866                    | 24                        |
| O3S               | Uccle               | 50.80      | 4.35       | 2000         | 2022       | 3265                   | 276                       |
| O3S               | Port Hardy          | 50.68      | -127.38    | 2018         | 2021       | 109                    | 29                        |

|       |                  |       |         |      |      |       |     |
|-------|------------------|-------|---------|------|------|-------|-----|
| IAGOS | FRA              | 50.05 | 8.57    | 2000 | 2022 | 14358 | 246 |
| O3S   | Kelowna          | 49.93 | -119.40 | 2003 | 2017 | 699   | 161 |
| IAGOS | CXH              | 49.27 | -123.12 | 2001 | 2011 | 2     | 2   |
| IAGOS | YVR              | 49.19 | -123.18 | 2000 | 2021 | 556   | 73  |
| IAGOS | CDG              | 49.00 | 2.57    | 2000 | 2022 | 2460  | 82  |
| IAGOS | ORY              | 48.73 | 2.36    | 2002 | 2018 | 149   | 8   |
| IAGOS | MUC              | 48.35 | 11.79   | 2000 | 2011 | 1983  | 51  |
| IAGOS | VIE              | 48.12 | 16.56   | 2000 | 2021 | 2367  | 91  |
| O3S   | Hohenpeissenberg | 47.80 | 11.01   | 2000 | 2023 | 3014  | 285 |
| IAGOS | SEA              | 47.44 | -122.30 | 2013 | 2022 | 113   | 28  |
| FTIR  | Zugspitze        | 47.42 | 10.98   | 2000 | 2022 | 19529 | 264 |
| IAGOS | YQB              | 46.79 | -71.38  | 2015 | 2022 | 5     | 2   |
| Umk   | 35 (Arosa)       | 46.78 | 9.68    | 2000 | 2022 | 2936  | 268 |
| FTIR  | Jungfrauoch      | 46.55 | 7.98    | 2000 | 2023 | 8649  | 261 |
| O3S   | Payerne          | 46.49 | 6.57    | 2002 | 2022 | 3112  | 244 |
| IAGOS | PDX              | 45.59 | -122.59 | 2003 | 2018 | 380   | 54  |
| IAGOS | YUL              | 45.46 | -73.75  | 2000 | 2021 | 272   | 51  |
| IAGOS | MSP              | 44.88 | -93.21  | 2013 | 2018 | 28    | 11  |
| IAGOS | BOD              | 44.83 | -0.70   | 2000 | 2018 | 11    | 7   |
| IAGOS | OTP              | 44.57 | 26.08   | 2004 | 2006 | 4     | 2   |
| FTIR  | Moshiri          | 44.40 | 142.30  | 2000 | 2007 | 1042  | 83  |
| Lidar | OHPO3T           | 43.94 | 5.71    | 2000 | 2022 | 1592  | 237 |
| O3S   | OHP              | 43.94 | 5.71    | 2000 | 2023 | 1075  | 279 |
| Umk   | 40 (OHP)         | 43.94 | 5.71    | 2000 | 2022 | 3596  | 238 |
| IAGOS | URC              | 43.90 | 87.48   | 2016 | 2016 | 2     | 2   |
| O3S   | Yarmouth         | 43.87 | -66.11  | 2003 | 2021 | 793   | 189 |
| IAGOS | YYZ              | 43.68 | -79.61  | 2000 | 2021 | 774   | 95  |
| FTIR  | Toronto          | 43.60 | -79.36  | 2002 | 2023 | 5497  | 210 |
| FTIR  | Rikubetsu        | 43.46 | 143.77  | 2000 | 2022 | 1745  | 191 |
| IAGOS | ALA              | 43.35 | 77.01   | 2001 | 2022 | 257   | 59  |
| IAGOS | CTS              | 42.79 | 141.68  | 2016 | 2018 | 23    | 8   |
| IAGOS | BOS              | 42.37 | -71.02  | 2000 | 2022 | 632   | 102 |
| O3S   | L'Aquila         | 42.30 | 13.31   | 2000 | 2023 | 342   | 116 |
| IAGOS | DTW              | 42.21 | -83.36  | 2000 | 2022 | 404   | 86  |
| IAGOS | ORD              | 41.98 | -87.90  | 2000 | 2021 | 1089  | 91  |
| IAGOS | SHE              | 41.86 | 123.43  | 2012 | 2021 | 219   | 43  |
| IAGOS | FCO              | 41.79 | 12.25   | 2016 | 2021 | 7     | 4   |
| O3S   | Trinidad Head    | 40.80 | -124.16 | 2000 | 2023 | 1239  | 273 |
| IAGOS | EWR              | 40.69 | -74.18  | 2000 | 2021 | 804   | 70  |



|       |                |       |         |      |      |      |     |
|-------|----------------|-------|---------|------|------|------|-----|
| IAGOS | JFK            | 40.64 | -73.79  | 2000 | 2022 | 761  | 88  |
| IAGOS | MAD            | 40.47 | -3.57   | 2014 | 2014 | 15   | 2   |
| O3S   | Madrid         | 40.47 | -3.58   | 2000 | 2022 | 935  | 234 |
| IAGOS | GYD            | 40.46 | 50.05   | 2001 | 2013 | 69   | 14  |
| IAGOS | PEK            | 40.08 | 116.59  | 2000 | 2021 | 236  | 50  |
| FTIR  | Boulder        | 40.04 | -105.24 | 2010 | 2022 | 3613 | 122 |
| O3S   | Boulder        | 40.00 | -105.25 | 2000 | 2023 | 1276 | 283 |
| Umk   | 67 (Boulder)   | 39.99 | -105.26 | 2000 | 2022 | 4721 | 272 |
| IAGOS | PHL            | 39.88 | -75.24  | 2000 | 2022 | 686  | 115 |
| IAGOS | DEN            | 39.85 | -104.67 | 2001 | 2022 | 48   | 18  |
| IAGOS | TSN            | 39.12 | 117.34  | 2020 | 2020 | 2    | 2   |
| IAGOS | CVG            | 39.06 | -84.66  | 2000 | 2004 | 6    | 2   |
| IAGOS | IAD            | 38.95 | -77.45  | 2000 | 2022 | 497  | 81  |
| IAGOS | LIS            | 38.77 | -9.13   | 2002 | 2021 | 5    | 3   |
| IAGOS | ASB            | 37.98 | 58.37   | 2001 | 2013 | 34   | 14  |
| IAGOS | ATH            | 37.94 | 23.95   | 2003 | 2017 | 8    | 5   |
| O3S   | Wallops Island | 37.93 | -75.48  | 2000 | 2020 | 1143 | 245 |
| IAGOS | SFO            | 37.62 | -122.39 | 2000 | 2018 | 153  | 39  |
| IAGOS | GMP            | 37.56 | 126.80  | 2000 | 2000 | 28   | 8   |
| IAGOS | ICN            | 37.45 | 126.45  | 2001 | 2022 | 171  | 35  |
| IAGOS | AYT            | 36.90 | 30.80   | 2000 | 2006 | 23   | 6   |
| IAGOS | DLM            | 36.72 | 28.78   | 2005 | 2005 | 10   | 3   |
| IAGOS | RHO            | 36.40 | 28.09   | 2002 | 2002 | 11   | 4   |
| IAGOS | TAO            | 36.27 | 120.38  | 2012 | 2022 | 127  | 48  |
| IAGOS | LAS            | 36.09 | -115.15 | 2017 | 2018 | 74   | 12  |
| FTIR  | Tsukuba        | 36.05 | 140.12  | 2014 | 2020 | 780  | 74  |
| IAGOS | MLA            | 35.86 | 14.48   | 2011 | 2019 | 13   | 9   |
| IAGOS | NRT            | 35.77 | 140.39  | 2000 | 2018 | 855  | 96  |
| IAGOS | THR            | 35.69 | 51.32   | 2000 | 2005 | 202  | 46  |
| IAGOS | HND            | 35.55 | 139.78  | 2017 | 2022 | 66   | 17  |
| IAGOS | IKA            | 35.41 | 51.15   | 2009 | 2022 | 150  | 35  |
| IAGOS | NKM            | 35.25 | 136.92  | 2000 | 2004 | 26   | 14  |
| IAGOS | CLT            | 35.22 | -80.94  | 2004 | 2011 | 36   | 9   |
| IAGOS | PUS            | 35.18 | 128.95  | 2016 | 2018 | 9    | 5   |
| IAGOS | NGO            | 34.86 | 136.81  | 2006 | 2020 | 413  | 76  |
| IAGOS | CGO            | 34.53 | 113.84  | 2016 | 2016 | 2    | 2   |
| IAGOS | KIX            | 34.44 | 135.24  | 2000 | 2018 | 634  | 83  |
| IAGOS | HIJ            | 34.44 | 132.92  | 2016 | 2017 | 4    | 2   |
| IAGOS | XIY            | 34.44 | 108.76  | 2016 | 2017 | 7    | 3   |

|       |       |       |         |      |      |      |     |
|-------|-------|-------|---------|------|------|------|-----|
| Lidar | TMF   | 34.38 | -117.68 | 2000 | 2023 | 2918 | 276 |
| IAGOS | LAX   | 33.94 | -118.41 | 2000 | 2018 | 255  | 34  |
| IAGOS | BEY   | 33.83 | 35.49   | 2013 | 2022 | 25   | 8   |
| IAGOS | ATL   | 33.64 | -84.44  | 2000 | 2022 | 1465 | 139 |
| IAGOS | FUK   | 33.58 | 130.44  | 2015 | 2018 | 75   | 14  |
| IAGOS | PHX   | 33.44 | -112.00 | 2001 | 2018 | 17   | 6   |
| IAGOS | DAL   | 32.84 | -96.85  | 2000 | 2022 | 734  | 131 |
| IAGOS | SAN   | 32.73 | -117.20 | 2017 | 2020 | 89   | 21  |
| IAGOS | TLV   | 32.00 | 34.87   | 2000 | 2022 | 305  | 59  |
| FTIR  | Hefei | 31.91 | 117.17  | 2015 | 2020 | 3375 | 55  |
| IAGOS | NKG   | 31.74 | 118.87  | 2009 | 2020 | 69   | 41  |
| IAGOS | AMM   | 31.72 | 35.99   | 2006 | 2020 | 3    | 2   |
| IAGOS | WUX   | 31.49 | 120.42  | 2016 | 2018 | 8    | 4   |
| IAGOS | SHA   | 31.20 | 121.34  | 2000 | 2000 | 11   | 3   |
| IAGOS | PVG   | 31.15 | 121.80  | 2000 | 2021 | 182  | 41  |
| IAGOS | WUH   | 30.78 | 114.21  | 2017 | 2018 | 17   | 8   |
| IAGOS | AUS   | 30.20 | -97.67  | 2019 | 2022 | 23   | 9   |
| IAGOS | CAI   | 30.12 | 31.41   | 2000 | 2019 | 320  | 44  |
| IAGOS | IAH   | 29.98 | -95.34  | 2000 | 2022 | 266  | 62  |
| IAGOS | NGB   | 29.82 | 121.46  | 2012 | 2018 | 11   | 8   |
| IAGOS | KWI   | 29.24 | 47.97   | 2001 | 2022 | 417  | 80  |
| IAGOS | DEL   | 28.56 | 77.10   | 2000 | 2021 | 607  | 77  |
| IAGOS | MCO   | 28.43 | -81.31  | 2008 | 2022 | 27   | 10  |
| FTIR  | Izaña | 28.30 | -16.48  | 2000 | 2022 | 7665 | 259 |
| O3S   | Izaña | 28.30 | -16.50  | 2000 | 2022 | 1086 | 270 |
| IAGOS | CSX   | 28.19 | 113.21  | 2015 | 2018 | 6    | 3   |
| IAGOS | TPA   | 27.98 | -82.54  | 2018 | 2022 | 11   | 5   |
| IAGOS | LPA   | 27.94 | -15.39  | 2002 | 2005 | 2    | 2   |
| IAGOS | KTM   | 27.70 | 85.36   | 2003 | 2006 | 10   | 5   |
| IAGOS | HRG   | 27.19 | 33.81   | 2000 | 2001 | 13   | 3   |
| IAGOS | DMM   | 26.47 | 49.80   | 2003 | 2022 | 68   | 31  |
| IAGOS | BAH   | 26.27 | 50.63   | 2010 | 2021 | 14   | 10  |
| IAGOS | OKA   | 26.20 | 127.65  | 2015 | 2018 | 31   | 10  |
| IAGOS | MIA   | 25.80 | -80.28  | 2001 | 2021 | 51   | 16  |
| IAGOS | LXR   | 25.67 | 32.70   | 2001 | 2001 | 4    | 4   |
| IAGOS | DOH   | 25.27 | 51.56   | 2012 | 2017 | 131  | 28  |
| IAGOS | DXB   | 25.25 | 55.35   | 2000 | 2022 | 448  | 88  |
| IAGOS | TPE   | 25.08 | 121.22  | 2012 | 2018 | 1422 | 40  |
| IAGOS | RUH   | 24.96 | 46.70   | 2000 | 2022 | 287  | 81  |

|       |                |       |         |      |      |      |     |
|-------|----------------|-------|---------|------|------|------|-----|
| IAGOS | XMN            | 24.54 | 118.13  | 2012 | 2018 | 31   | 14  |
| IAGOS | AUH            | 24.43 | 54.65   | 2003 | 2017 | 65   | 20  |
| IAGOS | MCT            | 23.59 | 58.29   | 2003 | 2015 | 38   | 12  |
| IAGOS | CAN            | 23.39 | 113.30  | 2009 | 2018 | 88   | 17  |
| IAGOS | KHH            | 22.57 | 120.35  | 2018 | 2018 | 6    | 2   |
| IAGOS | HKG            | 22.32 | 113.94  | 2000 | 2021 | 719  | 68  |
| IAGOS | JED            | 21.67 | 39.15   | 2001 | 2019 | 238  | 50  |
| IAGOS | HNL            | 21.33 | -157.92 | 2016 | 2018 | 239  | 24  |
| IAGOS | HAN            | 21.21 | 105.80  | 2016 | 2018 | 20   | 8   |
| IAGOS | CUN            | 21.04 | -86.87  | 2001 | 2021 | 31   | 10  |
| O3S   | Hanoi          | 21.01 | 105.80  | 2004 | 2021 | 350  | 121 |
| IAGOS | OGG            | 20.89 | -156.44 | 2017 | 2018 | 23   | 8   |
| IAGOS | POP            | 19.75 | -70.56  | 2001 | 2002 | 2    | 2   |
| IAGOS | KOA            | 19.74 | -156.04 | 2017 | 2018 | 4    | 3   |
| FTIR  | Mauna Loa      | 19.54 | -155.57 | 2000 | 2022 | 9025 | 165 |
| Umk   | 31 (Mauna Loa) | 19.54 | -155.58 | 2000 | 2022 | 7822 | 266 |
| O3S   | Hilo           | 19.43 | -155.04 | 2000 | 2023 | 1174 | 284 |
| FTIR  | Altzomoni      | 19.12 | -98.68  | 2012 | 2022 | 4307 | 100 |
| IAGOS | BOM            | 19.10 | 72.87   | 2000 | 2022 | 95   | 34  |
| IAGOS | PUJ            | 18.56 | -68.36  | 2021 | 2021 | 23   | 4   |
| IAGOS | NKC            | 18.10 | -15.95  | 2003 | 2022 | 64   | 15  |
| IAGOS | SXM            | 18.04 | -63.11  | 2013 | 2022 | 44   | 17  |
| IAGOS | HYD            | 17.24 | 78.43   | 2005 | 2018 | 485  | 62  |
| IAGOS | KRT            | 15.59 | 32.55   | 2000 | 2014 | 260  | 31  |
| IAGOS | SAH            | 15.47 | 44.23   | 2000 | 2004 | 10   | 4   |
| IAGOS | ASM            | 15.29 | 38.91   | 2002 | 2012 | 18   | 5   |
| IAGOS | DKR            | 14.74 | -17.49  | 2000 | 2009 | 50   | 12  |
| IAGOS | MNL            | 14.51 | 121.01  | 2005 | 2018 | 73   | 19  |
| IAGOS | DMK            | 13.91 | 100.61  | 2005 | 2006 | 211  | 13  |
| IAGOS | BKK            | 13.69 | 100.75  | 2006 | 2022 | 272  | 43  |
| IAGOS | GUM            | 13.49 | 144.80  | 2016 | 2016 | 2    | 2   |
| IAGOS | NIM            | 13.48 | 2.18    | 2002 | 2022 | 73   | 22  |
| IAGOS | BLR            | 13.20 | 77.71   | 2017 | 2022 | 50   | 10  |
| IAGOS | MAA            | 12.98 | 80.16   | 2000 | 2018 | 315  | 59  |
| IAGOS | BKO            | 12.54 | -7.95   | 2013 | 2017 | 29   | 15  |
| IAGOS | OUA            | 12.36 | -1.51   | 2002 | 2022 | 61   | 27  |
| IAGOS | NDJ            | 12.13 | 15.03   | 2013 | 2022 | 26   | 10  |
| IAGOS | JIB            | 11.55 | 43.15   | 2013 | 2018 | 9    | 6   |
| IAGOS | SGN            | 10.81 | 106.66  | 2005 | 2018 | 130  | 26  |

|       |                  |       |        |      |      |     |     |
|-------|------------------|-------|--------|------|------|-----|-----|
| IAGOS | CCS              | 10.60 | -67.01 | 2000 | 2018 | 722 | 104 |
| IAGOS | CEB              | 10.31 | 123.98 | 2018 | 2018 | 10  | 2   |
| IAGOS | SJO              | 10.00 | -84.20 | 2014 | 2022 | 42  | 20  |
| O3S   | Costa Rica       | 9.94  | -84.04 | 2005 | 2023 | 638 | 176 |
| IAGOS | CKY              | 9.58  | -13.62 | 2003 | 2022 | 58  | 25  |
| IAGOS | PTY              | 9.07  | -79.39 | 2017 | 2020 | 24  | 8   |
| IAGOS | ABV              | 9.00  | 7.27   | 2003 | 2022 | 247 | 54  |
| IAGOS | ADD              | 8.98  | 38.80  | 2001 | 2019 | 242 | 58  |
| IAGOS | FNA              | 8.62  | -13.20 | 2009 | 2022 | 9   | 5   |
| IAGOS | LOS              | 6.58  | 3.32   | 2000 | 2022 | 476 | 93  |
| IAGOS | COO              | 6.35  | 2.39   | 2001 | 2022 | 68  | 32  |
| IAGOS | LFW              | 6.17  | 1.25   | 2003 | 2022 | 60  | 26  |
| FTIR  | Paramaribo       | 5.81  | -55.20 | 2004 | 2016 | 234 | 17  |
| O3S   | Paramaribo       | 5.80  | -55.21 | 2000 | 2022 | 855 | 247 |
| IAGOS | ACC              | 5.61  | -0.17  | 2003 | 2022 | 45  | 19  |
| IAGOS | ABJ              | 5.25  | -3.93  | 2000 | 2022 | 118 | 26  |
| IAGOS | PHC              | 5.01  | 6.95   | 2002 | 2022 | 79  | 39  |
| IAGOS | CAY              | 4.82  | -52.37 | 2002 | 2022 | 112 | 8   |
| IAGOS | BOG              | 4.70  | -74.14 | 2000 | 2021 | 292 | 30  |
| IAGOS | MLE              | 4.20  | 73.52  | 2000 | 2022 | 27  | 12  |
| IAGOS | DLA              | 4.01  | 9.72   | 2000 | 2022 | 125 | 30  |
| IAGOS | SSG              | 3.76  | 8.72   | 2014 | 2022 | 126 | 41  |
| IAGOS | NSI              | 3.70  | 11.55  | 2017 | 2022 | 18  | 5   |
| IAGOS | KUL              | 2.76  | 101.71 | 2005 | 2016 | 72  | 15  |
| O3S   | Kuala Lumpur     | 2.73  | 101.27 | 2000 | 2022 | 456 | 203 |
| IAGOS | SIN              | 1.36  | 103.99 | 2000 | 2022 | 78  | 19  |
| IAGOS | LBV              | 0.46  | 9.41   | 2000 | 2022 | 12  | 7   |
| O3S   | San Cristobal    | -0.92 | -89.62 | 2000 | 2022 | 350 | 82  |
| O3S   | Nairobi          | -1.27 | 36.80  | 2000 | 2022 | 872 | 223 |
| IAGOS | NBO              | -1.32 | 36.93  | 2018 | 2022 | 89  | 28  |
| IAGOS | BZV              | -4.26 | 15.25  | 2002 | 2022 | 31  | 9   |
| IAGOS | FIH              | -4.39 | 15.45  | 2000 | 2022 | 73  | 21  |
| IAGOS | PNR              | -4.81 | 11.88  | 2014 | 2022 | 29  | 11  |
| O3S   | Natal            | -5.42 | -35.38 | 2000 | 2022 | 676 | 175 |
| IAGOS | CGK              | -6.13 | 106.66 | 2005 | 2018 | 54  | 11  |
| IAGOS | SUB              | -7.38 | 112.78 | 2016 | 2018 | 14  | 5   |
| O3S   | Watukosek        | -7.50 | 112.60 | 2000 | 2022 | 326 | 75  |
| O3S   | Ascension Island | -7.58 | -14.24 | 2000 | 2022 | 676 | 174 |
| IAGOS | DPS              | -8.74 | 115.16 | 2016 | 2018 | 20  | 7   |

|       |                 |        |         |      |      |       |     |
|-------|-----------------|--------|---------|------|------|-------|-----|
| FTIR  | Porto Velho     | -8.77  | -63.87  | 2019 | 2019 | 491   | 5   |
| IAGOS | LAD             | -8.85  | 13.23   | 2000 | 2022 | 175   | 68  |
| O3S   | Samoa           | -14.23 | -170.56 | 2000 | 2023 | 821   | 241 |
| IAGOS | HRE             | -17.92 | 31.10   | 2000 | 2000 | 20    | 8   |
| O3S   | Fiji            | -18.13 | 178.40  | 2000 | 2023 | 397   | 125 |
| IAGOS | TNR             | -18.80 | 47.48   | 2016 | 2017 | 9     | 3   |
| FTIR  | St Denis        | -20.90 | 55.48   | 2004 | 2011 | 1778  | 37  |
| O3S   | Reunion Island  | -21.06 | 55.48   | 2000 | 2022 | 735   | 215 |
| FTIR  | Maido           | -21.08 | 55.38   | 2013 | 2023 | 4460  | 76  |
| IAGOS | WDH             | -22.49 | 17.46   | 2000 | 2013 | 1618  | 69  |
| IAGOS | GIG             | -22.81 | -43.25  | 2000 | 2014 | 58    | 25  |
| IAGOS | GRU             | -23.43 | -46.48  | 2000 | 2021 | 23    | 11  |
| O3S   | Irene           | -25.90 | 28.22   | 2000 | 2023 | 391   | 140 |
| IAGOS | JNB             | -26.13 | 28.23   | 2000 | 2021 | 77    | 19  |
| IAGOS | BNE             | -27.40 | 153.11  | 2016 | 2018 | 61    | 11  |
| IAGOS | SYD             | -33.93 | 151.18  | 2013 | 2018 | 85    | 18  |
| IAGOS | CPT             | -33.97 | 18.60   | 2005 | 2021 | 103   | 34  |
| FTIR  | Wollongong      | -34.41 | 150.88  | 2007 | 2023 | 8481  | 150 |
| IAGOS | EZE             | -34.81 | -58.54  | 2014 | 2014 | 4     | 2   |
| IAGOS | AKL             | -37.00 | 174.78  | 2016 | 2018 | 59    | 13  |
| IAGOS | MEL             | -37.67 | 144.85  | 2016 | 2018 | 25    | 8   |
| IAGOS | CHC             | -43.49 | 172.54  | 2016 | 2018 | 20    | 6   |
| O3S   | Lauder          | -45.00 | 169.68  | 2000 | 2021 | 923   | 237 |
| FTIR  | Lauder          | -45.04 | 169.68  | 2001 | 2023 | 10389 | 252 |
| Umk   | 256 (Lauder)    | -45.04 | 169.68  | 2000 | 2022 | 2957  | 262 |
| FTIR  | Arrival Heights | -77.82 | 166.65  | 2000 | 2022 | 2563  | 176 |
| O3S   | Mc Murdo        | -77.85 | 166.67  | 2000 | 2010 | 295   | 36  |
| O3S   | South Pole      | -90.00 | 169.68  | 2000 | 2023 | 1371  | 279 |

**Table S2: Results of the intercomparison analysis between all coincident and collocated measurements (L1) for column-averaged tropospheric ozone column amounts (in ppbv, from surface to 300 hPa). The different columns show the sites (filenames of the time series at the HEGIFTOM ftp-server have been used), the number of coincident observations, the mean bias, the standard deviation of differences, the linear Pearson correlation coefficient, the slope and offset of the linear regression line. The rows are ordered in blocks according to the instruments compared with each other. The intercomparison selection criteria are sites within  $\pm 4^\circ$  in lat/lon, observations coincident within 12h (closest measurements) and requiring at least 15 coincident measurements.**

| site1                | site2            | N    | bias<br>(2 - 1) | stdev | r    | slope | offset |
|----------------------|------------------|------|-----------------|-------|------|-------|--------|
| mcmurdo_O3S          | Ahts_FTIR        | 39   | 3.80            | 3.42  | 0.56 | 0.57  | 18.42  |
| lauder_O3S           | Lauder_FTIR      | 309  | 2.54            | 5.47  | 0.61 | 0.76  | 11.22  |
| hilo_O3S             | Mauna_Loa_FTIR   | 389  | 10.57           | 8.32  | 0.80 | 1.16  | 4.31   |
| izana_O3S            | Izana_FTIR       | 431  | 5.37            | 7.68  | 0.82 | 1.07  | 1.80   |
| boulder_O3S          | Boulder_FTIR     | 211  | 1.36            | 6.41  | 0.79 | 0.90  | 7.25   |
| payerne_O3S          | Jungfrauoch_FTIR | 825  | 2.70            | 9.53  | 0.70 | 0.89  | 8.99   |
| hohenpeissenberg_O3S | Zugspitze_FTIR   | 1324 | 11.41           | 14.25 | 0.49 | 0.88  | 17.83  |
| sodankyla_O3S        | Kiruna_FTIR      | 344  | 6.07            | 9.92  | 0.53 | 0.73  | 20.95  |
| nyalesund_O3S        | Ny_Alesund_FTIR  | 118  | 3.80            | 9.81  | 0.53 | 0.51  | 33.57  |
| eureka_O3S           | Eureka_FTIR      | 239  | 9.90            | 6.82  | 0.73 | 0.75  | 23.12  |
| yarmouth_O3S         | BOS_IAGOS        | 20   | -1.84           | 7.17  | 0.72 | 0.95  | 1.33   |
| kelowna_O3S          | PDX_IAGOS        | 37   | 0.06            | 9.29  | 0.75 | 0.86  | 7.89   |
| kelowna_O3S          | YVR_IAGOS        | 19   | 1.81            | 9.28  | 0.66 | 1.43  | -19.51 |
| payerne_O3S          | FRA_IAGOS        | 2115 | -0.69           | 8.85  | 0.66 | 0.68  | 16.90  |
| hohenpeissenberg_O3S | MUC_IAGOS        | 303  | 2.85            | 7.45  | 0.74 | 0.80  | 12.84  |
| ucle_O3S             | ORY_IAGOS        | 35   | -2.82           | 8.94  | 0.29 | 0.28  | 37.02  |
| ucle_O3S             | CDG_IAGOS        | 1028 | -2.83           | 9.40  | 0.61 | 0.62  | 17.83  |
| ucle_O3S             | BRU_IAGOS        | 481  | 0.40            | 10.00 | 0.64 | 0.77  | 13.40  |
| debilt_O3S           | DUS_IAGOS        | 84   | -1.36           | 6.61  | 0.84 | 0.79  | 10.94  |
| legionowo_O3S        | VIE_IAGOS        | 458  | -1.95           | 10.01 | 0.66 | 0.70  | 15.62  |
| lauder_O3S           | 256_Umk          | 445  | -2.07           | 9.57  | 0.04 | 0.04  | 33.33  |
| hilo_O3S             | 031_Umk          | 43   | -9.26           | 7.72  | 0.57 | 0.51  | 9.15   |
| boulder_O3S          | 067_Umk          | 24   | -10.36          | 10.93 | 0.13 | 0.14  | 37.39  |
| ohp_O3S              | 040_Umk          | 456  | -10.05          | 12.72 | 0.44 | 0.60  | 13.00  |
| payerne_O3S          | 035_Umk          | 760  | -5.30           | 10.24 | 0.59 | 0.67  | 12.97  |
| sodankyla_O3S        | 105_Umk          | 224  | 0.97            | 12.36 | 0.29 | 0.46  | 31.91  |
| Mauna_Loa_FTIR       | HNL_IAGOS        | 55   | -6.12           | 8.54  | 0.76 | 0.61  | 13.91  |
| Tsukuba_FTIR         | KIX_IAGOS        | 17   | -5.17           | 6.62  | 0.12 | 0.07  | 45.55  |
| Tsukuba_FTIR         | NRT_IAGOS        | 17   | -3.81           | 8.88  | 0.35 | 0.26  | 38.52  |
| Toronto_FTIR         | DTW_IAGOS        | 54   | -5.54           | 11.44 | 0.54 | 0.47  | 27.74  |
| Toronto_FTIR         | YYZ_IAGOS        | 63   | -5.38           | 16.41 | 0.58 | 0.32  | 38.04  |

|                  |           |      |       |       |      |      |        |
|------------------|-----------|------|-------|-------|------|------|--------|
| Jungfrauoch_FTIR | FRA_IAGOS | 2330 | -5.92 | 11.24 | 0.57 | 0.46 | 26.94  |
| Zugspitze_FTIR   | MUC_IAGOS | 363  | -9.83 | 13.56 | 0.55 | 0.33 | 33.26  |
| Lauder_FTIR      | 256_Umk   | 950  | -5.09 | 8.12  | 0.29 | 0.31 | 21.67  |
| Jungfrauoch_FTIR | 035_Umk   | 1080 | -7.76 | 9.92  | 0.66 | 0.64 | 13.01  |
| Kiruna_FTIR      | 105_Umk   | 373  | -6.50 | 14.90 | 0.30 | 0.32 | 36.88  |
| 031_Umk          | HNL_IAGOS | 46   | 8.46  | 7.46  | 0.59 | 0.80 | 15.83  |
| 035_Umk          | FRA_IAGOS | 2209 | 2.46  | 11.18 | 0.52 | 0.44 | 30.00  |
| KIX_IAGOS        | NKM_IAGOS | 15   | 0.68  | 5.64  | 0.94 | 1.17 | -10.00 |
| KIX_IAGOS        | NRT_IAGOS | 44   | 0.76  | 11.66 | 0.57 | 0.46 | 29.19  |
| CDG_IAGOS        | BRU_IAGOS | 743  | 1.55  | 10.57 | 0.58 | 0.67 | 19.60  |
| DUS_IAGOS        | AMS_IAGOS | 22   | 2.13  | 7.63  | 0.58 | 0.53 | 27.49  |
| TMF_Lidar        | LAX_IAGOS | 33   | -2.80 | 6.55  | 0.84 | 0.93 | 1.10   |
| TMF_Lidar        | LAS_IAGOS | 17   | -4.97 | 8.67  | 0.74 | 0.57 | 20.64  |
| OHPO3T_Lidar     | ohp_O3S   | 205  | -5.43 | 11.90 | 0.52 | 0.41 | 31.03  |

75

80

85

90 **Table S3: Same as Table S2, but now for the column-averaged tropospheric ozone column monthly means (in ppbv). The coincidence criterion is now that monthly means from the same month are compared.**

| site1                | site2            | N   | Bias<br>(2 - 1) | stdev | r     | slope | offset |
|----------------------|------------------|-----|-----------------|-------|-------|-------|--------|
| mcmurdo_O3S          | Ahts_FTIR        | 26  | 3.50            | 2.13  | 0.54  | 0.58  | 18.08  |
| lauder_O3S           | Lauder_FTIR      | 210 | 2.31            | 3.55  | 0.76  | 0.94  | 4.33   |
| paramaribo_O3S       | Paramaribo_FTIR  | 16  | 2.70            | 6.79  | 0.44  | 0.45  | 21.19  |
| hilo_O3S             | Mauna_Loa_FTIR   | 200 | 10.49           | 6.05  | 0.78  | 0.99  | 10.97  |
| izana_O3S            | Izana_FTIR       | 257 | 4.96            | 5.83  | 0.84  | 1.13  | -2.03  |
| boulder_O3S          | Boulder_FTIR     | 120 | 2.27            | 6.38  | 0.67  | 0.83  | 11.51  |
| payerne_O3S          | Jungfrauoch_FTIR | 226 | 4.51            | 6.12  | 0.78  | 0.88  | 10.86  |
| hohenpeissenberg_O3S | Zugspitze_FTIR   | 305 | 11.10           | 10.39 | 0.51  | 0.85  | 19.02  |
| sodankyla_O3S        | Kiruna_FTIR      | 252 | 5.05            | 6.84  | 0.70  | 0.90  | 10.78  |
| nyalesund_O3S        | Ny_Alesund_FTIR  | 146 | 3.45            | 7.20  | 0.61  | 0.87  | 11.17  |
| eureka_O3S           | Eureka_FTIR      | 94  | 10.18           | 6.02  | 0.76  | 0.96  | 12.53  |
| irene_O3S            | JNB_IAGOS        | 19  | -6.68           | 8.42  | 0.66  | 0.58  | 16.63  |
| nairobi_O3S          | NBO_IAGOS        | 20  | -1.46           | 6.50  | 0.63  | 0.62  | 13.82  |
| kualalumpur_O3S      | SIN_IAGOS        | 22  | -2.36           | 8.70  | 0.66  | 1.15  | -7.09  |
| hilo_O3S             | HNL_IAGOS        | 23  | 5.63            | 6.27  | 0.50  | 0.62  | 20.09  |
| boulder_O3S          | DEN_IAGOS        | 17  | -0.85           | 6.60  | 0.66  | 0.91  | 4.40   |
| yarmouth_O3S         | BOS_IAGOS        | 53  | -3.02           | 6.20  | 0.63  | 0.73  | 13.19  |
| kelowna_O3S          | PDX_IAGOS        | 43  | -1.38           | 7.75  | 0.43  | 0.59  | 20.16  |
| kelowna_O3S          | YVR_IAGOS        | 56  | 0.07            | 6.01  | 0.63  | 0.82  | 9.07   |
| payerne_O3S          | FRA_IAGOS        | 214 | -0.11           | 4.36  | 0.86  | 0.84  | 8.35   |
| hohenpeissenberg_O3S | MUC_IAGOS        | 55  | 2.55            | 4.06  | 0.88  | 0.94  | 5.71   |
| uccele_O3S           | CDG_IAGOS        | 119 | -1.85           | 4.70  | 0.83  | 0.86  | 5.94   |
| uccele_O3S           | BRU_IAGOS        | 54  | 0.01            | 3.26  | 0.93  | 1.07  | -3.76  |
| debilt_O3S           | DUS_IAGOS        | 61  | 2.63            | 5.85  | 0.84  | 1.01  | 2.35   |
| debilt_O3S           | AMS_IAGOS        | 22  | 1.03            | 4.84  | 0.83  | 0.92  | 5.44   |
| edmonton_O3S         | YYC_IAGOS        | 16  | -0.17           | 5.29  | 0.64  | 0.71  | 14.90  |
| legionowo_O3S        | VIE_IAGOS        | 146 | -1.78           | 5.22  | 0.86  | 0.84  | 7.44   |
| lauder_O3S           | 256_Umk          | 342 | -1.59           | 6.94  | -0.11 | -0.10 | 38.43  |
| hilo_O3S             | 031_Umk          | 398 | -5.20           | 5.37  | 0.73  | 0.58  | 11.72  |
| boulder_O3S          | 067_Umk          | 400 | -12.14          | 6.43  | 0.63  | 0.46  | 17.95  |
| ohp_O3S              | 040_Umk          | 303 | -10.14          | 7.49  | 0.70  | 0.81  | 0.34   |
| payerne_O3S          | 035_Umk          | 235 | -4.69           | 4.95  | 0.83  | 0.81  | 5.65   |
| sodankyla_O3S        | 105_Umk          | 172 | -0.73           | 7.66  | 0.46  | 0.56  | 24.21  |
| Mauna_Loa_FTIR       | HNL_IAGOS        | 22  | -5.65           | 5.61  | 0.71  | 0.63  | 12.92  |
| Tsukuba_FTIR         | KIX_IAGOS        | 19  | -4.88           | 7.51  | 0.71  | 0.53  | 23.36  |



|                  |           |     |        |       |      |      |       |
|------------------|-----------|-----|--------|-------|------|------|-------|
| Tsukuba_FTIR     | NGO_IAGOS | 34  | -5.00  | 8.33  | 0.76 | 0.72 | 13.09 |
| Tsukuba_FTIR     | NRT_IAGOS | 18  | -8.09  | 6.99  | 0.86 | 0.51 | 22.43 |
| Toronto_FTIR     | DTW_IAGOS | 58  | -9.54  | 8.33  | 0.55 | 0.54 | 19.22 |
| Toronto_FTIR     | YYZ_IAGOS | 60  | -6.31  | 7.83  | 0.62 | 0.52 | 22.63 |
| Jungfrauoch_FTIR | FRA_IAGOS | 230 | -5.26  | 6.23  | 0.78 | 0.68 | 13.76 |
| Zugspitze_FTIR   | MUC_IAGOS | 50  | -11.45 | 10.36 | 0.54 | 0.38 | 28.77 |
| Lauder_FTIR      | 256_Umk   | 235 | -4.34  | 6.65  | 0.10 | 0.07 | 31.48 |
| Boulder_FTIR     | 067_Umk   | 121 | -12.95 | 6.37  | 0.66 | 0.49 | 16.45 |
| Jungfrauoch_FTIR | 035_Umk   | 250 | -9.90  | 7.30  | 0.68 | 0.57 | 15.55 |
| Kiruna_FTIR      | 105_Umk   | 171 | -5.13  | 8.72  | 0.51 | 0.46 | 27.58 |
| 031_Umk          | HNL_IAGOS | 21  | 7.58   | 5.04  | 0.71 | 1.09 | 4.48  |
| 067_Umk          | DEN_IAGOS | 15  | 10.28  | 9.35  | 0.13 | 0.19 | 46.08 |
| 035_Umk          | FRA_IAGOS | 303 | 3.68   | 6.57  | 0.69 | 0.75 | 16.40 |
| KIX_IAGOS        | NGO_IAGOS | 16  | -0.72  | 6.53  | 0.81 | 0.97 | 0.85  |
| KIX_IAGOS        | NKM_IAGOS | 36  | 0.05   | 8.30  | 0.77 | 1.05 | -2.86 |
| KIX_IAGOS        | NRT_IAGOS | 111 | 2.59   | 8.69  | 0.62 | 0.62 | 22.85 |
| NGO_IAGOS        | NRT_IAGOS | 20  | 1.30   | 11.15 | 0.40 | 0.29 | 39.09 |
| NKM_IAGOS        | NRT_IAGOS | 23  | 3.26   | 8.56  | 0.76 | 0.58 | 26.26 |
| DTW_IAGOS        | YYZ_IAGOS | 36  | 0.22   | 7.02  | 0.65 | 0.58 | 22.21 |
| PDX_IAGOS        | YVR_IAGOS | 18  | 2.66   | 11.28 | 0.04 | 0.06 | 46.50 |
| CDG_IAGOS        | BRU_IAGOS | 45  | 0.89   | 3.14  | 0.93 | 1.10 | -4.30 |
| TMF_Lidar        | SAN_IAGOS | 20  | -4.81  | 6.56  | 0.70 | 0.59 | 18.77 |
| TMF_Lidar        | LAX_IAGOS | 33  | -3.13  | 5.38  | 0.80 | 0.83 | 6.53  |
| OHPO3T_Lidar     | ohp_O3S   | 235 | -5.98  | 7.83  | 0.64 | 0.57 | 20.65 |
| OHPO3T_Lidar     | 040_Umk   | 206 | -16.41 | 9.86  | 0.46 | 0.45 | 17.63 |

95

100

**Table S4: Same as Table S2, but now for the tropospheric ozone column amounts from the surface to 300 hPa in Dobson Unit (DU).**

| site1                | site2            | N    | Bias<br>(2 - 1) | stdev | r    | slope | offset |
|----------------------|------------------|------|-----------------|-------|------|-------|--------|
| mcmurdo_O3S          | Ahts_FTIR        | 39   | 1.41            | 1.83  | 0.59 | 0.55  | 9.77   |
| lauder_O3S           | Lauder_FTIR      | 309  | 1.31            | 2.85  | 0.62 | 0.75  | 6.11   |
| hilo_O3S             | Mauna_Loa_FTIR   | 389  | -7.44           | 3.34  | 0.79 | 0.59  | 1.91   |
| izana_O3S            | Izana_FTIR       | 431  | -6.57           | 3.29  | 0.82 | 0.77  | 0.56   |
| boulder_O3S          | Boulder_FTIR     | 211  | 1.19            | 2.73  | 0.79 | 0.90  | 3.53   |
| payerne_O3S          | Jungfrauoch_FTIR | 825  | -12.01          | 3.66  | 0.73 | 0.53  | 1.97   |
| hohenpeissenberg_O3S | Zugspitze_FTIR   | 1324 | -4.40           | 4.73  | 0.51 | 0.59  | 5.80   |
| sodankyla_O3S        | Kiruna_FTIR      | 344  | 3.97            | 5.47  | 0.52 | 0.71  | 12.56  |
| nyalesund_O3S        | Ny_Alesund_FTIR  | 118  | 2.32            | 5.60  | 0.52 | 0.50  | 19.34  |
| eureka_O3S           | Eureka_FTIR      | 239  | 1.79            | 4.28  | 0.69 | 0.57  | 14.91  |
| yarmouth_O3S         | BOS_IAGOS        | 20   | -2.93           | 2.99  | 0.81 | 0.92  | -0.18  |
| kelowna_O3S          | PDX_IAGOS        | 37   | 0.76            | 5.44  | 0.68 | 0.56  | 13.27  |
| kelowna_O3S          | YVR_IAGOS        | 19   | 0.89            | 3.97  | 0.65 | 1.23  | -4.98  |
| payerne_O3S          | FRA_IAGOS        | 2115 | -0.14           | 4.19  | 0.70 | 0.68  | 8.96   |
| hohenpeissenberg_O3S | MUC_IAGOS        | 303  | 2.53            | 3.40  | 0.76 | 0.82  | 6.97   |
| uccele_O3S           | ORY_IAGOS        | 35   | -3.27           | 4.24  | 0.40 | 0.30  | 18.08  |
| uccele_O3S           | CDG_IAGOS        | 1028 | -2.98           | 4.73  | 0.64 | 0.59  | 9.52   |
| uccele_O3S           | BRU_IAGOS        | 481  | -1.28           | 4.38  | 0.72 | 0.73  | 7.09   |
| debilt_O3S           | DUS_IAGOS        | 84   | -2.52           | 3.59  | 0.85 | 0.77  | 4.88   |
| legionowo_O3S        | VIE_IAGOS        | 458  | -2.65           | 5.13  | 0.69 | 0.65  | 8.46   |
| lauder_O3S           | 256_Umk          | 445  | -1.23           | 5.10  | 0.02 | 0.02  | 17.94  |
| hilo_O3S             | 031_Umk          | 43   | -9.94           | 3.93  | 0.46 | 0.32  | 4.15   |
| boulder_O3S          | 067_Umk          | 24   | -4.03           | 4.52  | 0.14 | 0.16  | 15.29  |
| ohp_O3S              | 040_Umk          | 456  | -5.09           | 6.65  | 0.41 | 0.52  | 8.73   |
| payerne_O3S          | 035_Umk          | 760  | -8.72           | 4.72  | 0.59 | 0.51  | 5.21   |
| sodankyla_O3S        | 105_Umk          | 224  | 0.49            | 6.68  | 0.30 | 0.47  | 16.98  |
| Mauna_Loa_FTIR       | HNL_IAGOS        | 55   | 9.18            | 3.46  | 0.76 | 1.04  | 8.59   |
| Tsukuba_FTIR         | KIX_IAGOS        | 17   | -3.61           | 3.51  | 0.23 | 0.17  | 22.08  |
| Tsukuba_FTIR         | NRT_IAGOS        | 17   | -3.70           | 4.47  | 0.48 | 0.28  | 19.52  |
| Toronto_FTIR         | DTW_IAGOS        | 54   | -4.58           | 6.44  | 0.46 | 0.32  | 18.67  |
| Toronto_FTIR         | YYZ_IAGOS        | 63   | -4.57           | 9.52  | 0.51 | 0.24  | 22.01  |
| Jungfrauoch_FTIR     | FRA_IAGOS        | 2330 | 10.90           | 4.34  | 0.59 | 0.80  | 14.55  |
| Zugspitze_FTIR       | MUC_IAGOS        | 363  | 6.68            | 4.64  | 0.56 | 0.53  | 16.39  |
| Lauder_FTIR          | 256_Umk          | 950  | -2.80           | 4.30  | 0.28 | 0.30  | 11.66  |
| Jungfrauoch_FTIR     | 035_Umk          | 1080 | 2.92            | 3.61  | 0.66 | 0.87  | 5.19   |

|              |           |      |       |      |      |      |       |
|--------------|-----------|------|-------|------|------|------|-------|
| Kiruna_FTIR  | 105_Umk   | 373  | -4.44 | 8.07 | 0.30 | 0.33 | 19.59 |
| 031_Umk      | HNL_IAGOS | 46   | 10.60 | 3.84 | 0.60 | 1.13 | 8.75  |
| 035_Umk      | FRA_IAGOS | 2209 | 7.57  | 5.04 | 0.51 | 0.54 | 16.57 |
| KIX_IAGOS    | NKM_IAGOS | 15   | -0.05 | 2.11 | 0.96 | 1.07 | -2.52 |
| KIX_IAGOS    | NRT_IAGOS | 44   | 0.12  | 5.99 | 0.59 | 0.45 | 15.69 |
| CDG_IAGOS    | BRU_IAGOS | 743  | 0.98  | 4.51 | 0.66 | 0.76 | 7.83  |
| DUS_IAGOS    | AMS_IAGOS | 22   | 1.21  | 3.63 | 0.68 | 0.53 | 14.68 |
| TMF_Lidar    | LAX_IAGOS | 33   | 8.57  | 3.70 | 0.81 | 1.33 | 1.60  |
| TMF_Lidar    | LAS_IAGOS | 17   | 4.76  | 3.24 | 0.76 | 0.82 | 8.71  |
| OHPO3T_Lidar | ohp_O3S   | 205  | 5.51  | 4.79 | 0.53 | 0.66 | 13.25 |

105

110

115

120

**Table S5: Same as Table S3, but now for the tropospheric ozone column amounts from the surface to 300 hPa in Dobson Unit (DU).**

| site1                | site2            | N   | Bias<br>(2 - 1) | stdev | r     | slope | offset |
|----------------------|------------------|-----|-----------------|-------|-------|-------|--------|
| mcmurdo_O3S          | Ahts_FTIR        | 26  | 1.27            | 1.20  | 0.57  | 0.55  | 9.55   |
| lauder_O3S           | Lauder_FTIR      | 210 | 1.20            | 1.86  | 0.76  | 0.94  | 2.43   |
| paramaribo_O3S       | Paramaribo_FTIR  | 16  | 1.51            | 3.78  | 0.45  | 0.46  | 11.79  |
| hilo_O3S             | Mauna_Loa_FTIR   | 200 | -7.44           | 2.86  | 0.77  | 0.50  | 3.88   |
| izana_O3S            | Izana_FTIR       | 257 | -6.50           | 2.41  | 0.84  | 0.82  | -1.21  |
| boulder_O3S          | Boulder_FTIR     | 120 | 1.57            | 2.72  | 0.66  | 0.80  | 6.12   |
| payerne_O3S          | Jungfrauoch_FTIR | 226 | -10.89          | 2.65  | 0.82  | 0.53  | 2.33   |
| hohenpeissenberg_O3S | Zugspitze_FTIR   | 305 | -4.43           | 3.48  | 0.54  | 0.59  | 5.74   |
| sodankyla_O3S        | Kiruna_FTIR      | 252 | 3.59            | 3.78  | 0.71  | 0.90  | 6.57   |
| nyalesund_O3S        | Ny_Alesund_FTIR  | 146 | 2.34            | 4.29  | 0.57  | 0.79  | 9.31   |
| eureka_O3S           | Eureka_FTIR      | 94  | 2.03            | 3.03  | 0.77  | 0.86  | 6.17   |
| irene_O3S            | JNB_IAGOS        | 19  | -4.48           | 3.74  | 0.66  | 0.52  | 6.92   |
| nairobi_O3S          | NBO_IAGOS        | 20  | -1.01           | 2.53  | 0.66  | 0.62  | 5.22   |
| kualalumpur_O3S      | SIN_IAGOS        | 22  | -1.47           | 4.59  | 0.67  | 1.11  | -3.36  |
| hilo_O3S             | HNL_IAGOS        | 23  | 2.29            | 3.38  | 0.53  | 0.60  | 10.82  |
| boulder_O3S          | DEN_IAGOS        | 17  | -0.47           | 2.28  | 0.71  | 0.88  | 2.42   |
| yarmouth_O3S         | BOS_IAGOS        | 53  | -3.31           | 3.36  | 0.65  | 0.63  | 9.39   |
| kelowna_O3S          | PDX_IAGOS        | 43  | -0.10           | 3.64  | 0.46  | 0.51  | 13.31  |
| kelowna_O3S          | YVR_IAGOS        | 56  | 0.34            | 2.77  | 0.63  | 0.68  | 8.65   |
| payerne_O3S          | FRA_IAGOS        | 214 | 0.11            | 2.09  | 0.88  | 0.85  | 4.27   |
| hohenpeissenberg_O3S | MUC_IAGOS        | 55  | 2.31            | 2.00  | 0.89  | 1.00  | 2.38   |
| ucle_O3S             | CDG_IAGOS        | 119 | -2.53           | 2.54  | 0.83  | 0.79  | 3.93   |
| ucle_O3S             | BRU_IAGOS        | 54  | -1.44           | 1.57  | 0.93  | 1.00  | -1.36  |
| debilt_O3S           | DUS_IAGOS        | 61  | -0.18           | 3.23  | 0.84  | 0.96  | 1.13   |
| debilt_O3S           | AMS_IAGOS        | 22  | -1.30           | 2.58  | 0.83  | 0.83  | 4.16   |
| edmonton_O3S         | YYC_IAGOS        | 16  | -2.33           | 2.59  | 0.58  | 0.51  | 10.36  |
| legionowo_O3S        | VIE_IAGOS        | 146 | -2.71           | 2.69  | 0.88  | 0.81  | 3.21   |
| lauder_O3S           | 256_Umk          | 342 | -0.88           | 3.68  | -0.12 | -0.12 | 20.62  |
| hilo_O3S             | 031_Umk          | 398 | -9.22           | 3.15  | 0.73  | 0.39  | 4.59   |
| boulder_O3S          | 067_Umk          | 400 | -4.65           | 2.64  | 0.64  | 0.48  | 7.44   |
| ohp_O3S              | 040_Umk          | 303 | -4.98           | 4.00  | 0.66  | 0.76  | 1.78   |
| payerne_O3S          | 035_Umk          | 235 | -8.27           | 2.52  | 0.82  | 0.63  | 2.30   |
| sodankyla_O3S        | 105_Umk          | 172 | -0.46           | 4.22  | 0.46  | 0.54  | 13.86  |
| Mauna_Loa_FTIR       | HNL_IAGOS        | 22  | 8.95            | 2.54  | 0.72  | 1.15  | 6.78   |
| Tsukuba_FTIR         | KIX_IAGOS        | 19  | -4.03           | 4.35  | 0.68  | 0.47  | 13.91  |
| Tsukuba_FTIR         | NGO_IAGOS        | 34  | -4.29           | 4.42  | 0.77  | 0.68  | 7.20   |

|                  |           |     |       |      |      |      |       |
|------------------|-----------|-----|-------|------|------|------|-------|
| Tsukuba_FTIR     | NRT_IAGOS | 18  | -5.88 | 3.88 | 0.85 | 0.52 | 11.01 |
| Toronto_FTIR     | DTW_IAGOS | 58  | -6.77 | 4.46 | 0.54 | 0.51 | 10.19 |
| Toronto_FTIR     | YYZ_IAGOS | 60  | -5.51 | 4.40 | 0.57 | 0.45 | 13.01 |
| Jungfrauoch_FTIR | FRA_IAGOS | 230 | 10.78 | 2.63 | 0.81 | 1.20 | 7.22  |
| Zugspitze_FTIR   | MUC_IAGOS | 50  | 5.53  | 3.74 | 0.59 | 0.65 | 12.79 |
| Lauder_FTIR      | 256_Umk   | 235 | -2.34 | 3.49 | 0.10 | 0.07 | 16.65 |
| Boulder_FTIR     | 067_Umk   | 121 | -5.72 | 2.66 | 0.67 | 0.49 | 6.68  |
| Jungfrauoch_FTIR | 035_Umk   | 250 | 2.37  | 2.34 | 0.72 | 0.82 | 5.56  |
| Kiruna_FTIR      | 105_Umk   | 171 | -3.71 | 4.75 | 0.53 | 0.46 | 14.58 |
| 031_Umk          | HNL_IAGOS | 21  | 9.95  | 2.84 | 0.73 | 1.58 | 2.02  |
| 067_Umk          | DEN_IAGOS | 15  | 3.86  | 3.55 | 0.15 | 0.19 | 18.79 |
| 035_Umk          | FRA_IAGOS | 303 | 7.92  | 3.16 | 0.70 | 0.97 | 8.62  |
| KIX_IAGOS        | NGO_IAGOS | 16  | -0.30 | 3.65 | 0.78 | 0.94 | 1.50  |
| KIX_IAGOS        | NKM_IAGOS | 36  | -0.38 | 4.15 | 0.78 | 1.01 | -0.67 |
| KIX_IAGOS        | NRT_IAGOS | 111 | 1.18  | 4.18 | 0.69 | 0.64 | 11.56 |
| NGO_IAGOS        | NRT_IAGOS | 20  | 0.27  | 5.60 | 0.38 | 0.26 | 21.36 |
| NKM_IAGOS        | NRT_IAGOS | 23  | 1.52  | 4.03 | 0.83 | 0.58 | 13.68 |
| DTW_IAGOS        | YYZ_IAGOS | 36  | -0.31 | 3.45 | 0.70 | 0.63 | 9.88  |
| PDX_IAGOS        | YVR_IAGOS | 18  | 0.80  | 4.58 | 0.12 | 0.18 | 21.42 |
| CDG_IAGOS        | BRU_IAGOS | 45  | 0.54  | 1.53 | 0.94 | 1.11 | -2.46 |
| TMF_Lidar        | SAN_IAGOS | 20  | 7.23  | 2.89 | 0.69 | 0.81 | 11.28 |
| TMF_Lidar        | LAX_IAGOS | 33  | 7.97  | 2.80 | 0.79 | 1.19 | 4.09  |
| OHPO3T_Lidar     | ohp_O3S   | 235 | 5.20  | 3.17 | 0.69 | 0.90 | 7.37  |
| OHPO3T_Lidar     | 040_Umk   | 206 | 0.02  | 4.19 | 0.49 | 0.71 | 6.61  |

125

130

135

**Table S6: Summary of trend differences, drifts, and their causes between the time series at collocate sites. The sampling is described by percentage of months with data and by the average number of observations for each month with data.**

| station        | technique | sampling            | QR trend [ppbv/dec] | drift [ppbv/dec]                                          | site comments                                                | general comment                                                                                                                                                                                    |
|----------------|-----------|---------------------|---------------------|-----------------------------------------------------------|--------------------------------------------------------------|----------------------------------------------------------------------------------------------------------------------------------------------------------------------------------------------------|
| <b>Izaña</b>   | O3S       | 97.8%<br>4.0/month  | <b>+2.59±0.68</b>   |                                                           | launch at coast (36 m a.s.l.)                                | despite drift between series, no significant trend difference                                                                                                                                      |
|                | FTIR      | 96.3%<br>8.6/month  | <b>+1.88±0.88</b>   | -1.53±0.88                                                | FTIR located at mountain top (2373m)                         |                                                                                                                                                                                                    |
| <b>Boulder</b> | O3S       | 99.7% 4.5           | <b>-1.14±0.86</b>   |                                                           | DLM trends always negative over the years                    | interannual variability not always similar, no significant DLM trend differences over the years                                                                                                    |
|                | Umkehr    | 98.6%<br>13.5/month | +0.11±0.72          | +1.24±0.84                                                | DLM trends close to zero over the years                      |                                                                                                                                                                                                    |
| <b>Lauder</b>  | O3S       | 91.9%<br>3.8/month  | +0.13±0.50          |                                                           | ends in mid 2022, while other two continue until 2023        | Umkehr different seasonal cycle than the other two techniques? Very low correlation coefficients between Umkehr and O3S/FTIR time series. Less positive trends compared to Bjorklund et al. (2024) |
|                | FTIR      | 98.1%<br>10.9/month | <b>+1.54±0.44</b>   | +1.97±0.80<br>(vs. O3S)<br><br>+0.97±0.81<br>(vs. Umkehr) | positive drift of FTIR vs. other two                         |                                                                                                                                                                                                    |
|                | Umkehr    | 95.3%<br>9.0/month  | +0.36±0.70          |                                                           | Umkehr turns from negative to positive trends in 2014 (DLM)  |                                                                                                                                                                                                    |
| <b>OHP</b>     | O3S       | 97.9%<br>3.9/month  | <b>+1.95±1.08</b>   |                                                           |                                                              | especially large differences in beginning of time series                                                                                                                                           |
|                | Umkehr    | 88.5%<br>11.3/month | <b>-1.49±1.00</b>   | -2.74±1.44<br>(vs. O3S)                                   | DLM negative trends over the entire period                   |                                                                                                                                                                                                    |
|                | Lidar     | 85.9%<br>6.7/month  | <b>+1.93±1.02</b>   |                                                           | significantly positive trend by DLM during the entire period |                                                                                                                                                                                                    |

|               |        |                     |                   |                         |                                                                                                                                                     |                                                                                                                                                                                       |
|---------------|--------|---------------------|-------------------|-------------------------|-----------------------------------------------------------------------------------------------------------------------------------------------------|---------------------------------------------------------------------------------------------------------------------------------------------------------------------------------------|
| <b>Hawaii</b> | O3S    | 100%<br>4.1/month   | -0.28±0.98        |                         | launch at coast<br>(11 m a.s.l.),<br>drop in TCO<br>since 2014                                                                                      | due to TCO<br>drop in<br>ozonesonde<br>time series,<br>positive drifts<br>of other<br>techniques vs.<br>O3S. Umkehr<br>and FTIR<br>trends, located<br>at same spot,<br>are consistent |
|               | Umkehr | 96.7%<br>19.7/month | <b>+1.83±0.44</b> | +1.97±0.88<br>(vs. O3S) | located at<br>mountain top<br>(3397 m),<br>significant<br>positive trends<br>since 2004<br>(DLM).                                                   |                                                                                                                                                                                       |
|               | FTIR   | 60%<br>14.4/month   | <b>+2.03±1.30</b> | +1.71±1.45<br>(vs. O3S) | located at<br>mountain top<br>(3397 m),<br>sparse data<br>coverage in<br>beginning of<br>time period,<br>constant trend<br>of 0.2 ppbv/yr<br>by DLM |                                                                                                                                                                                       |

140

145

150

Table S7: Same as Table S6, but now for different techniques at nearby sites.

| station     | technique | sampling            | Trend<br>[ppb/dec] | drift<br>[ppb/dec]                                  | site comments                                                                                                                                                                                                                                                  | general<br>comment                                                                                                                                         |
|-------------|-----------|---------------------|--------------------|-----------------------------------------------------|----------------------------------------------------------------------------------------------------------------------------------------------------------------------------------------------------------------------------------------------------------------|------------------------------------------------------------------------------------------------------------------------------------------------------------|
| Sodankylä   | O3S       | 92.0%<br>4.2/month  | <b>-1.28±0.78</b>  |                                                     |                                                                                                                                                                                                                                                                | in<br>agreement                                                                                                                                            |
| Kiruna      | FTIR      | 85.2%<br>7.3/month  | <b>-2.26±0.88</b>  |                                                     |                                                                                                                                                                                                                                                                |                                                                                                                                                            |
| Uccle       | O3S       | 100%<br>11.8/month  | <b>+0.90±0.48</b>  |                                                     |                                                                                                                                                                                                                                                                | overall very<br>good<br>agreement<br>between the<br>3 time<br>series, De<br>Bilt most<br>deviant from<br>other 2 due<br>to lower<br>sampling<br>frequency? |
| De Bilt     | O3S       | 100%<br>4.3/month   | <b>+1.34±0.86</b>  |                                                     | higher variability<br>in monthly<br>anomalies due to<br>lower launch rate                                                                                                                                                                                      |                                                                                                                                                            |
| Frankfurt   | IAGOS     | 90.8%<br>24.6/month | <b>+0.65±0.36</b>  |                                                     | outliers associated<br>with large<br>statistical<br>uncertainty or<br>single monthly<br>value (2005)                                                                                                                                                           |                                                                                                                                                            |
| Payerne     | O3S       | 100%<br>12.8/month  | <b>-1.30±0.62</b>  |                                                     | altitude: 491m,<br>homogenized time<br>series starts in<br>2002, other 2 start<br>in 2000,<br>“smoother”<br>anomaly time<br>series (higher<br>monthly<br>sampling?), DLM<br>negative trends<br>during entire<br>period (but only<br>significant until<br>2009) | especially<br>large<br>differences<br>in beginning<br>of time<br>series                                                                                    |
| Arosa       | Umkehr    | 97.1%<br>8.1/month  | +0.56±0.78         | +1.93±0.96<br>(vs. O3S)<br>+1.88±1.18<br>(vs. FTIR) | altitude: 1840 m                                                                                                                                                                                                                                               |                                                                                                                                                            |
| Jungfrauoch | FTIR      | 93.9%<br>8.6/month  | <b>-1.78±0.66</b>  |                                                     | altitude: 3580 m,<br>free troposphere                                                                                                                                                                                                                          |                                                                                                                                                            |



|                         |      |                    |                   |  |                                                                                 |                                                                                                                                     |
|-------------------------|------|--------------------|-------------------|--|---------------------------------------------------------------------------------|-------------------------------------------------------------------------------------------------------------------------------------|
| <b>Hohenpeissenberg</b> | O3S  | 100%<br>10.6/month | <b>+0.50±0.46</b> |  | altitude: 975 m<br>Brewer-Mast type                                             | although different trend sign, no significant drift between both time series. Is altitude differences driving the trend difference? |
| <b>Zugspitze</b>        | FTIR | 95.7%<br>9.7/month | <b>-1.82±0.88</b> |  | altitude: 2960 m,<br>low values at beginning of time period, higher variability |                                                                                                                                     |

155
